# Supplementary material for: Interfacial electronic structure modulation enables CoMoOx/CoOx/RuOx to boost advanced oxygen evolution electrocatalysis
Source: Royal Society of Chemistry journal article supplement (doi:10.1039/d1ta01226f), 2021-01-01
Supplement: d1ta01226f1.pdf [file d1ta01226f1.pdf]

**Supporting Information for**  
**Interfacial Electronic Structure Modulation Enables**  
**CoMoO<sub>x</sub>/CoO<sub>x</sub>/RuO<sub>x</sub> an Advanced Oxygen Evolution**  
**Electrocatalysis**

Cheng Wang, Hongyuan Shang, Yuan Wang, Hui Xu\*, Jie Li and Yukou Du \*

*College of Chemistry, Chemical Engineering and Materials Science, Soochow*

*University, Suzhou 215123, PR China*

\* Corresponding author: Tel: 86-512-65880967, Fax: 86-512-65880089;

*E-mail: ndxuhui006@gmail.com; duyk@suda.edu.cn (Y. Du)*

## **Experimental section**

### **Synthesis of ZIF-67**

In a typical synthesis, 58.3 mg of Co(NO<sub>3</sub>)<sub>2</sub>·6H<sub>2</sub>O was dissolved in 2 mL of deionized water containing 1 mg of cetyltrimethylammonium bromide (CTAB). Then this solution was rapidly injected into 15 mL of aqueous solution containing 908 mg of 2-methylimidazole and stirred at room temperature for 20 min. The product was collected by centrifugation and washed by ethanol for several times.

### **Synthesis of CoMoO<sub>4</sub>-Co(OH)<sub>2</sub>**

22 mg freshly prepared ZIF-67 nanocubes were dispersed in 10 mL ethanol to form solution A, and 100 mg of Na<sub>2</sub>MoO<sub>4</sub> was dissolved in 10 mL H<sub>2</sub>O + 10 mL ethanol to form solution B. Subsequently, solution A was injected into solution B rapidly with continuous stirring at 80 °C for 2 h. After being cooled to room temperature, the

product was rinsed by ethanol several times and separated by centrifugation.

### **Synthesis of Ru-CoMoO<sub>4</sub>-Co(OH)<sub>2</sub>**

The freshly prepared CoMoO<sub>4</sub>-Co(OH)<sub>2</sub> nanoboxes were dispersed in 10 mL of ethanol by ultrasound. At the same time, 2 mg of RuCl<sub>3</sub> was dissolved in a solution containing 2 mL of H<sub>2</sub>O. RuCl<sub>3</sub> solution was added to the CoMoO<sub>4</sub>-Co(OH)<sub>2</sub> solution drop by drop with continuous stirring for 5h at room temperature. After that, the product were collected by centrifugation and washing 3 times with ethanol.

### **Synthesis of CoMoRuO<sub>x</sub>**

To obtain CoMoRuO<sub>x</sub>, 10 mg of the as-prepared Ru-CoMoO<sub>4</sub>-Co(OH)<sub>2</sub> were annealed in air at different temperatures (300°C, 350 °C, 400°C) for 2 h with a ramp rate of 2 °C min<sup>-1</sup>. The finally obtained catalyst was named as CoMoRuO<sub>x</sub>-a (a represents the temperature) for easy distinction.

### **Characterizations**

The chemical compositions of the all samples were determined by SEM-energy-dispersive-X-ray spectroscopy (SEM-EDS). Low-magnification transmission electron microscopy (TEM) was performed on a HITACHI HT7700 at 120 kV. High-angle annular dark-field scanning transmission electron microscopy (HAADF-STEM) and HRTEM was recorded on a FEI TecnaiG2F2 FEI Talos F200X S/TEM with a field-emission gun at 200 kV. X-ray photoelectron spectroscopy (XPS) was performed on SSI S-Probe XPS Spectrometer. Powder X-ray diffraction (PXRD) patterns were collected on X'Pert-Pro MPD diffractometer (Netherlands PANalytical) with a Cu K $\alpha$  X-ray source ( $\lambda = 1.540598 \text{ \AA}$ ).

## Electrochemical tests

All electrochemical measurements were performed on CHI660 workstation (Chenhua, Shanghai) by using the three-electrode system. The system consisted of a graphite rod counter electrode, Ag/AgCl reference electrode, and a glassy carbon electrode (GCE) as working electrode. To prepare the catalyst ink, 6 mg catalysts were added into a mixture solution including 1.6 mL of isopropanol, 0.4 mL of H<sub>2</sub>O and 20 μL Nafion. After 30 min sonication, 20 μL catalyst ink was deposited on glassy carbon electrode (diameter 5 mm, area: 0.196 cm<sup>2</sup>) as a working electrode. The polarization curves were performed in 1 M KOH solution without iR compensation. The Tafel slopes were derived from polarization curves. Prolonged CP tests were conducted at the current density of 10 mA cm<sup>-2</sup>. Electrochemical water splitting was tested by using a two-electrode system.

## Calculation of ECSA

The calculation of the electrochemical surface areas (ECSA) are based on the measured double layer capacitance of the catalysts modified electrode in 1.0 M KOH according to previous published report. Briefly, a potential range where no apparent Faradaic process happened was determined firstly using the static CV. The charging current  $i_c$  was measured from the CVs at different scan rates. The relation between  $i_c$ , the scan rate ( $v$ ) and the double layer capacitance ( $C_{DL}$ ) was given in eq 1. Therefore, the  $C_{DL}$  is then calculated according to:  $C_{DL} = d(\Delta j(0 \text{ V vs. RHE}))/2dv$ .

$$i_c = v C_{DL} \quad (1)$$

For the estimation of ECSA, a specific capacitance ( $C_S$ ) value  $C_S = 0.040 \text{ mF cm}^{-2}$  in

1.0 M KOH.

$$ECSA = C_{DL} / C_S \quad (2)$$

### Supporting Figures and Tables

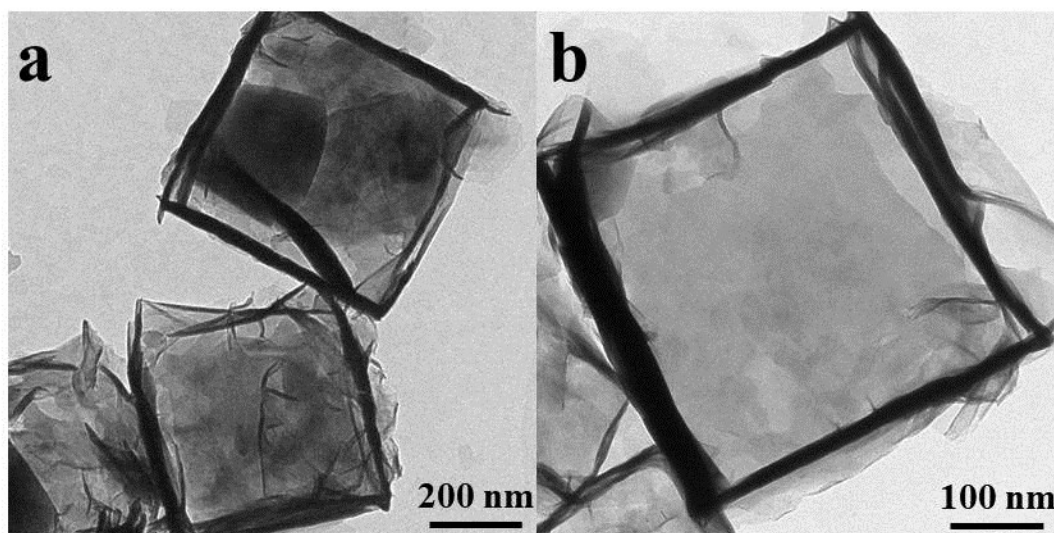

**Fig.S1** Representative TEM images of the  $\text{CoMoO}_4\text{-Co(OH)}_2$ .

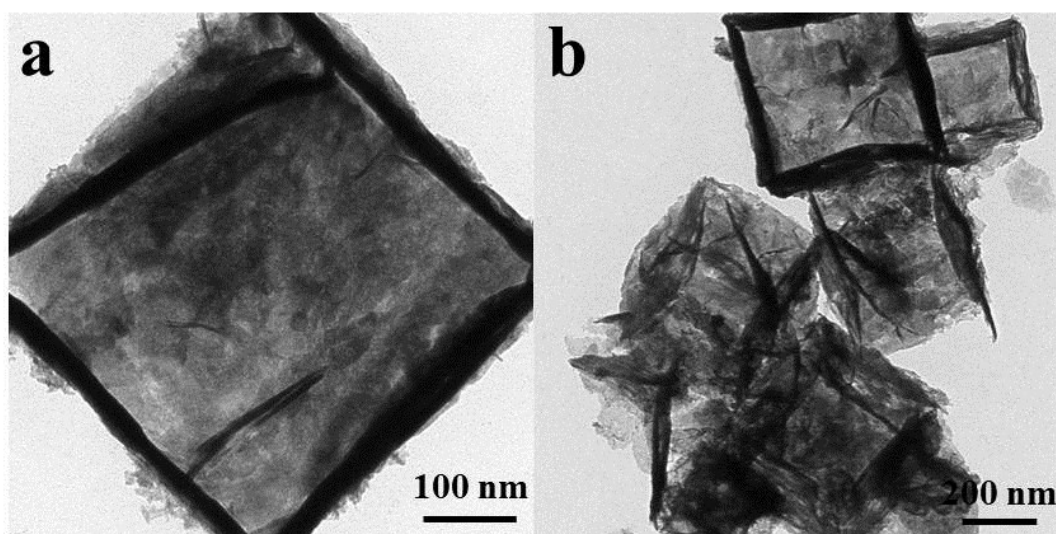

**Fig.S2** Representative TEM images of the heterostructured  $\text{CoMoRuO}_x$  nanoboxes.

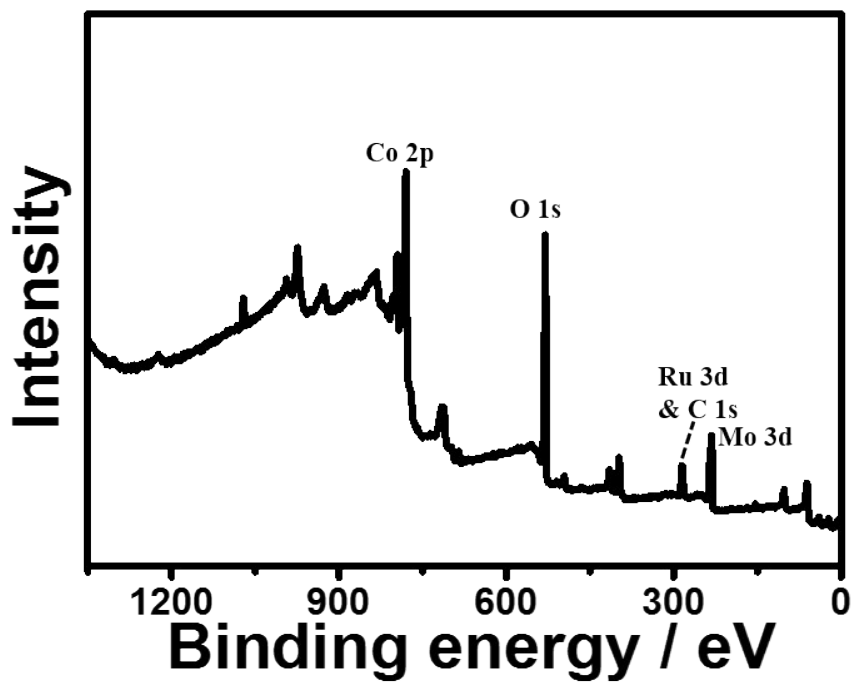

Fig.S3 Survey spectrum of the heterostructured  $\text{CoMoRuO}_x$  nanoboxes.

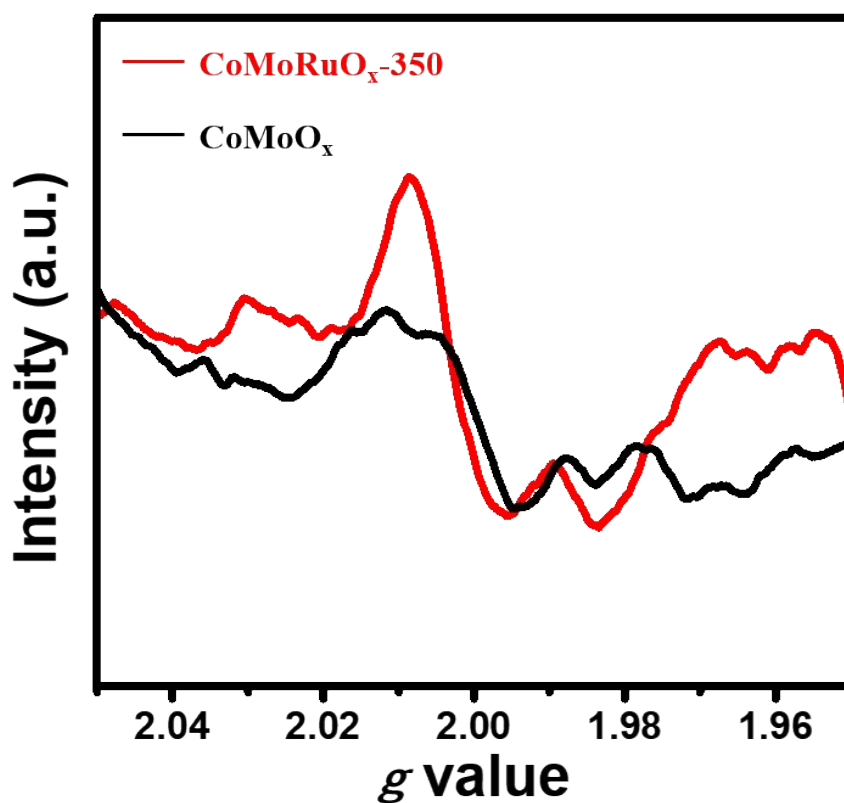

Fig.S4 EPR spectra of the  $\text{CoMoRuO}_x$  and  $\text{CoMoO}_x$ .

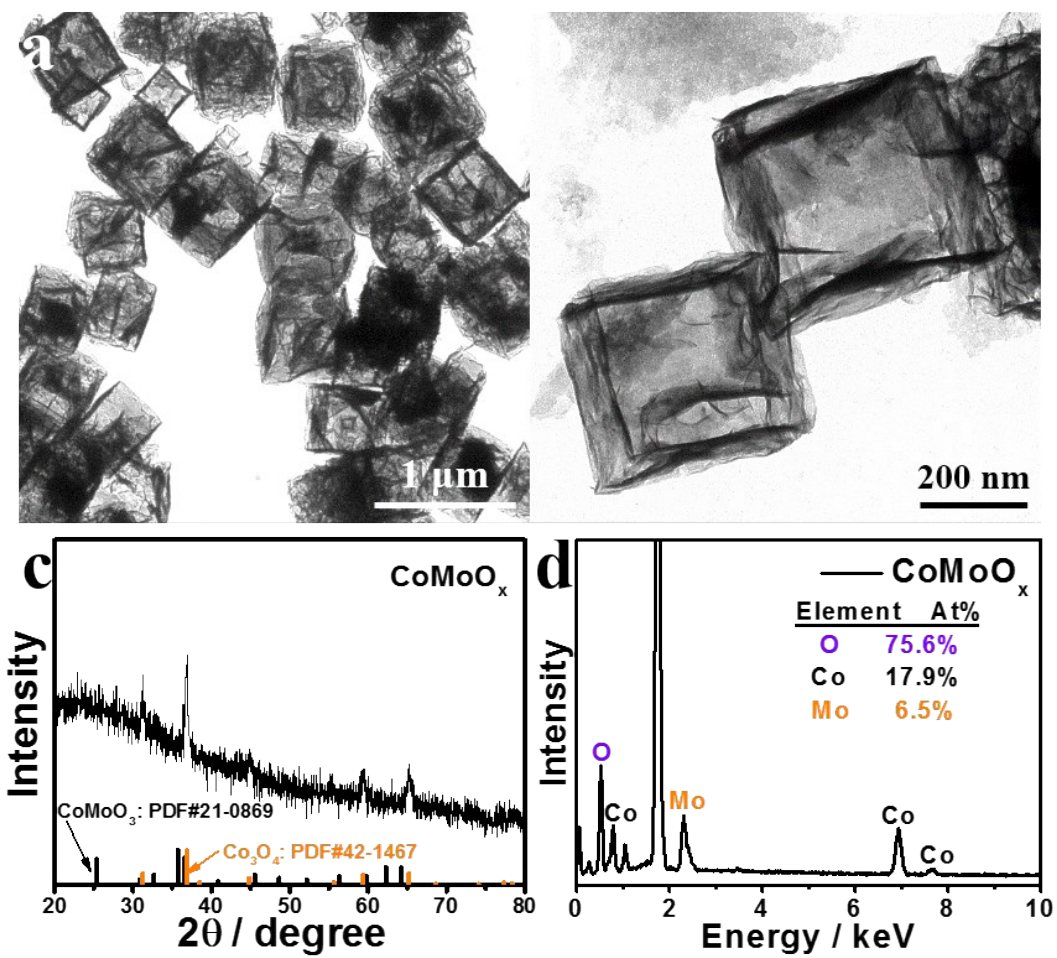

**Fig.S5** (a, b) Representative TEM images of the CoMoO<sub>x</sub> nanoboxes. (c) XRD pattern and (d) EDS spectrum of the CoMoO<sub>x</sub> nanoboxes.

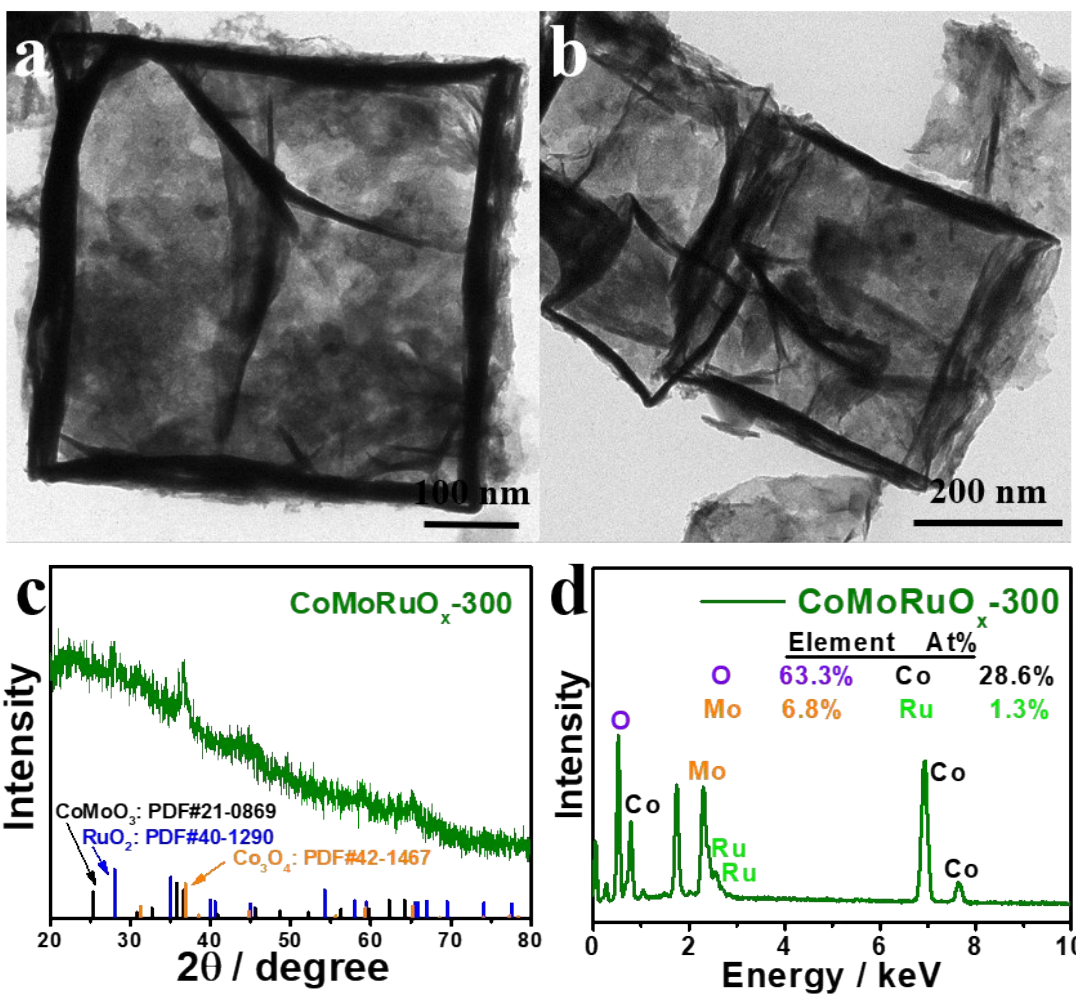

**Fig.S6** (a, b) Representative TEM images of the  $\text{CoMoRuO}_x\text{-300}$  nanoboxes. (c) XRD pattern and (d) EDS spectrum of the  $\text{CoMoRuO}_x\text{-300}$  nanoboxes.

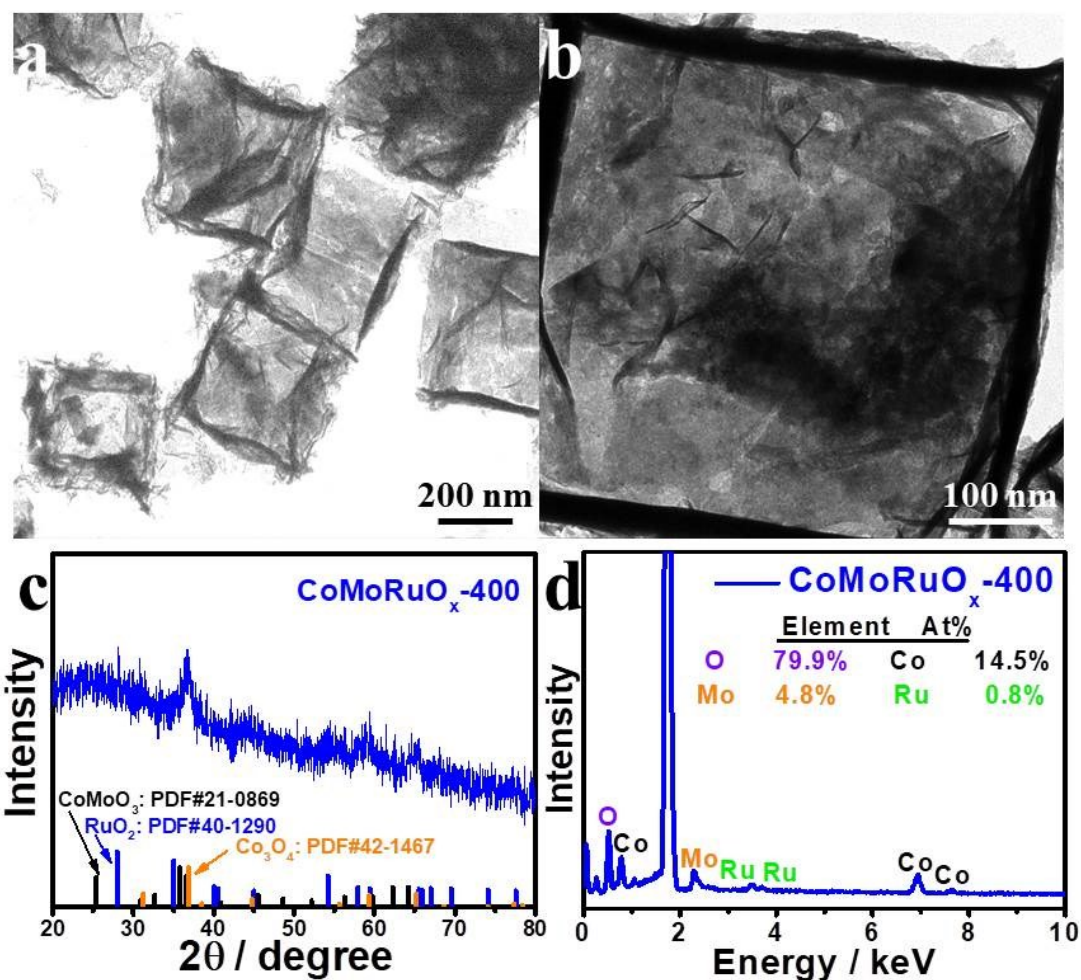

Fig.S7 (a, b) Representative TEM images of the CoMoRuO<sub>x</sub>-400 nanoboxes. (c) XRD pattern and (d) EDS spectrum of the CoMoRuO<sub>x</sub>-400 nanoboxes.

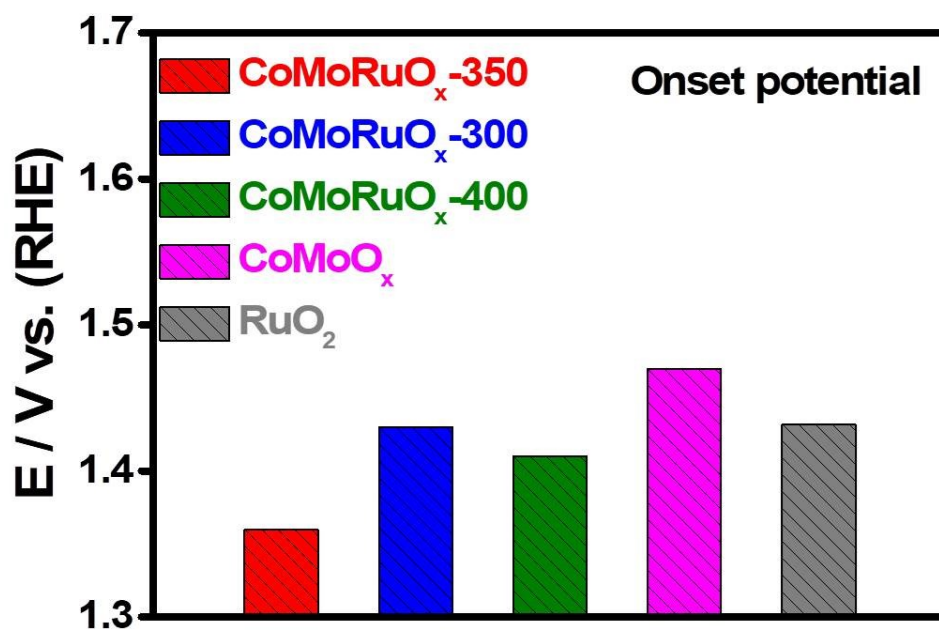

Fig.S8 Histogram of the onset potentials of different electrocatalysts toward OER.



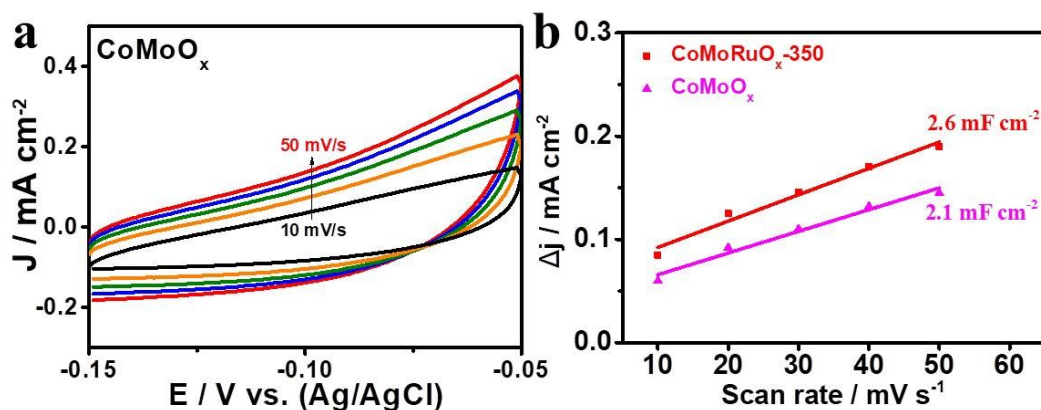

**Fig.S9** (a) CV curves of CoMoO<sub>x</sub> in 1 M KOH solution at different scan rates. (b) Double layer currents of different catalysts versus scan rate.

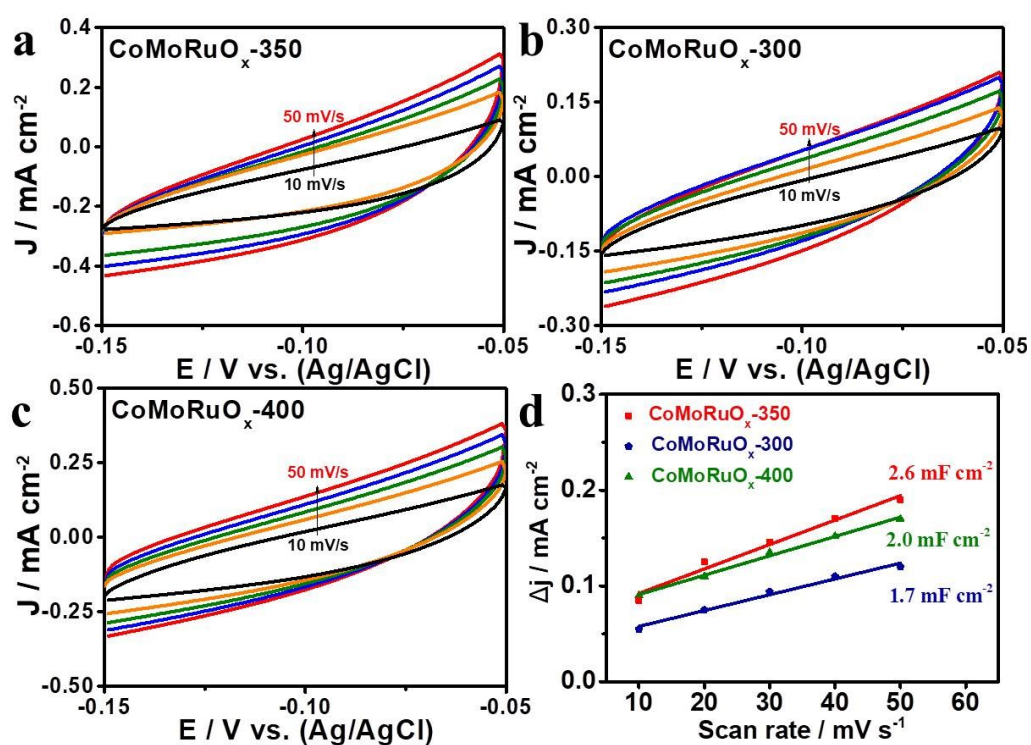

**Fig.S10** CV curves of (a) CoMoRuO<sub>x</sub>-350, (b) CoMoRuO<sub>x</sub>-300, and (c) CoMoRuO<sub>x</sub>-400 in 1 M KOH solution at different scan rates. (d) Double layer currents of different catalysts versus scan rate.

**Table S1** OER activity comparison of different electrocatalysts.

| Catalyst                                                                            | $\eta$ (mV) | Electrolyte | Reference                                    |
|-------------------------------------------------------------------------------------|-------------|-------------|----------------------------------------------|
| <b>CoMoRuO<sub>x</sub></b>                                                          | <b>250</b>  | 1.0 M KOH   | <b>This work</b>                             |
| <b>CoVO<sub>x</sub>-300</b>                                                         | 330         | 1.0 M KOH   | Appl. Catal. B: Environ. 2020, 265, 118605   |
| <b>Ru SAs/AC-FeCoNi</b>                                                             | 205         | 1.0 M KOH   | Adv. Energy Mater. 2020, 2002816             |
| <b>VO-(Co, Fe)<sub>3</sub>O<sub>4</sub>/CC</b>                                      | 286         | 1.0 M KOH   | Appl. Surf. Sci. 2020, 529, 147125           |
| <b>Ru-NiCoP/NF</b>                                                                  | 216         | 1.0 M KOH   | Appl. Catal. B: Environ. 2020, 279, 119396   |
| <b>1-RuO<sub>2</sub>/CeO<sub>2</sub></b>                                            | 350         | 1.0 M KOH   | Int. J. Hydrog. Energy 2020, 45, 18635-18644 |
| <b>NiMoRuO (CC)</b>                                                                 | 280         | 1.0 M KOH   | Chem. Eng. J. DOI:10.1016/j.cej.2020.127686  |
| <b>N<sub>1</sub>-CoP@NPCNFs-900</b>                                                 | 266         | 1.0 M KOH   | J. Alloys Compd. 2021, 854, 156830           |
| <b>Co<sub>3</sub>O<sub>4</sub>-24 h</b>                                             | 296         | 1.0 M KOH   | J. Colloid Interface Sci. 2021, 582, 322-332 |
| <b>N-NiCoP<sub>x</sub>/NCF</b>                                                      | 298         | 1.0 M KOH   | Chem. Eng. J. 2020, 402, 126257              |
| <b>Co/<math>\beta</math>-Mo<sub>2</sub>C@N-CNTs</b>                                 | 356         | 1.0 M KOH   | Angew. Chem. Int. Ed. 2019, 58, 4923–4928    |
| <b>FeCo@C</b>                                                                       | 302         | 1.0 M KOH   | Int. J. Hydrog. Energy 2020, 45, 26574-26582 |
| <b>Co<sub>3</sub>O<sub>4</sub>/Fe<sub>2</sub>O<sub>3</sub></b>                      | 310         | 1.0 M KOH   | Chem. Eng. J. 2019, 355, 336-340             |
| <b>Co<sub>3</sub>O<sub>4</sub>/Co<sub>0.85</sub>Se/Co<sub>9</sub>Se<sub>8</sub></b> | 360         | 1.0 M KOH   | Inorg. Chem. 2020, 59, 17326                 |
| <b>CoO<sub>x</sub>/CoNy@CN<sub>z,700</sub></b>                                      | 280         | 1.0 M KOH   | Appl. Catal. B: Environ. 2020, 279, 119407   |
| <b>C-CoP-1/12</b>                                                                   | 321         | 1.0 M KOH   | Nanoscale 2019, 11, 17084–17092              |
| <b>Co<sub>3</sub>O<sub>4</sub>-MoS<sub>2</sub></b>                                  | 298         | 1.0 M KOH   | J. Alloys Compd. 2021, 853, 156946           |
| <b>Co-Mo<sub>2</sub>C@NCNT</b>                                                      | 377         | 1.0 M KOH   | ACS Sustain. Chem. Eng. 2018, 6, 9912–9920   |

**Table S2** EIS fitting parameters from equivalent circuits of samples during electrocatalytic process.

| Samples              | $R_s$<br>/ $\Omega \text{ cm}^{-2}$ | $R_0$<br>/ $\Omega \text{ cm}^{-2}$ | Q<br>/ S s-n | $R_{ct}$<br>/ $\Omega \text{ cm}^{-2}$ | $Q_1$<br>/ S s-n |
|----------------------|-------------------------------------|-------------------------------------|--------------|----------------------------------------|------------------|
| CoMoRuO <sub>x</sub> | 7.2                                 | 2.5                                 | 4.60E-2      | 3.6                                    | 0.21E-3          |
| CoMoO <sub>x</sub>   | 6.8                                 | 7.4                                 | 2.14E-2      | 394                                    | 2.73E-3          |
